# Supplementary material for: Overexpression of GATA-3 in T Cells Accelerates Dextran Sulfate Sodium-Induced Colitis
Source: PubMed Central journal article supplement — Exp Anim. 2014 Apr 26;63(2):133–40. doi: 10.1538/expanim.63.133 (PMC4160978; doi:10.1538/expanim.63.133), 2014-04-26
Supplement: expanim-63-133-s001.pdf [file expanim-63-133-s001.pdf]

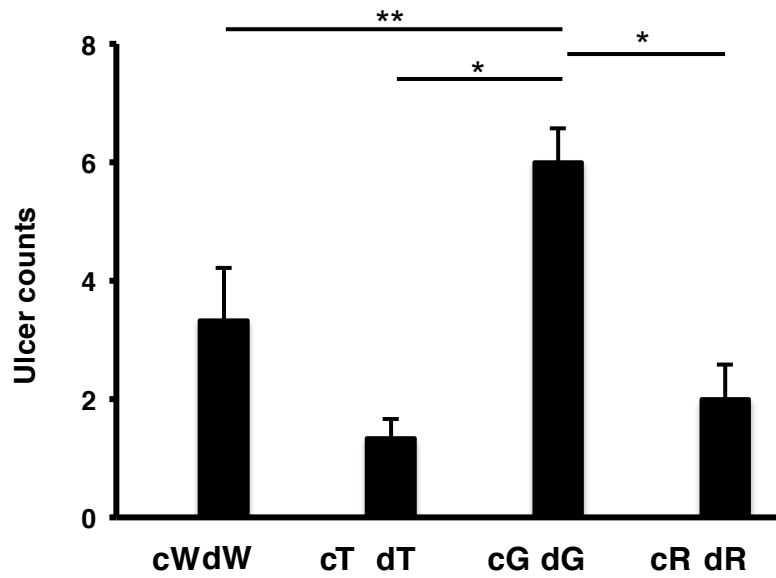

Supplementary Fig. 1. Ulcer counts. Colon ulcer counters were performed on day 4 of DSS treatment. c, control. d, DSS treated. W, wild-type mice. T, T-bet Tg mice. G, GATA-3 Tg mice. R, ROR $\gamma$ t Tg mice. Data represent means  $\pm$  SEM (\* $P$ <0.01; \*\* $P$ <0.05) (n=3, each group).

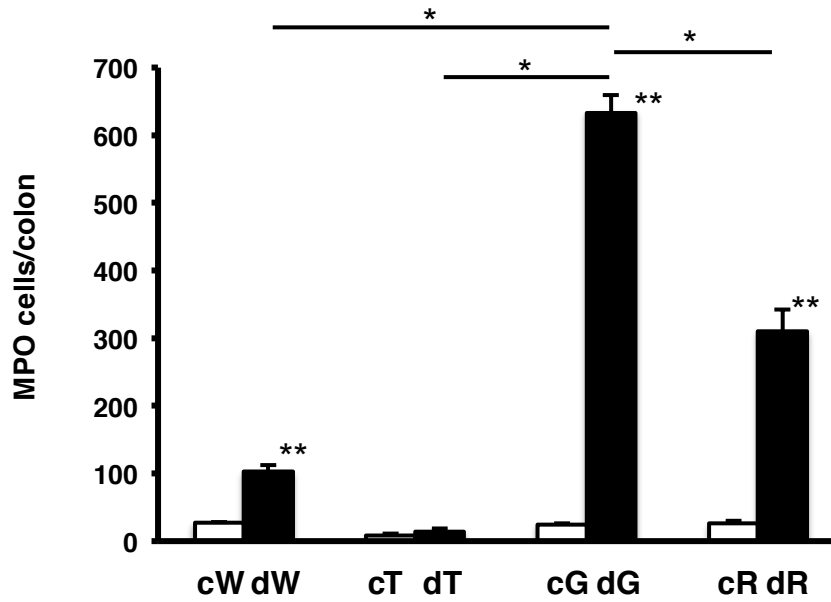

Supplementary Fig. 2. MPO-positive cells in the colon. MPO-positive cells were counted on day 4 of DSS treatment. c, control. d, DSS treated. W, wild-type mice. T, T-bet Tg mice. G, GATA-3 Tg mice. R, ROR $\gamma$ t Tg mice. Data represent means  $\pm$  SEM (\* $P$ <0.01; \*\* $P$ <0.01, DSS treated vs. control) (n=3, each group).

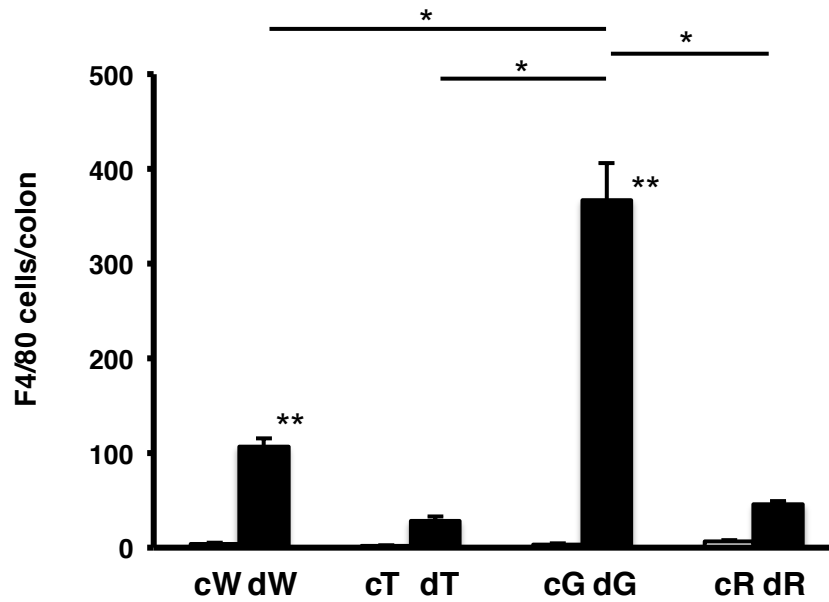

Supplementary Fig. 3. F4/80-positive cells in the colon. F4/80-positive cells were counted on day 4 of DSS treatment. c, control. d, DSS treated. W, wild-type mice. T, T-bet Tg mice. G, GATA-3 Tg mice. R, ROR $\gamma$ t Tg mice. Data represent means  $\pm$  SEM (\* $P < 0.01$ ; \*\* $P < 0.01$ , DSS treated vs. control) (n=3, each group).
